# Supplementary material
Source: HighWire-hosted journal article supplement (http://ajnr-stage2.highwire.org/highwire/filestream/181541/field_highwire_adjunct_files/0/A1043.pdf)
Supplement: A1043.pdf [file A1043.pdf]

**On-line Table 1: Radiologic findings, histology, and follow-up in 5 patients with nonmalignant polyps in the nasopharynx**

| Case | Radiologic Features                                                                                                                                                                                                                                                                                                                                                                                                                                       | Histology |                             |                            | Follow-Up                                                                                                                                                                                                       |
|------|-----------------------------------------------------------------------------------------------------------------------------------------------------------------------------------------------------------------------------------------------------------------------------------------------------------------------------------------------------------------------------------------------------------------------------------------------------------|-----------|-----------------------------|----------------------------|-----------------------------------------------------------------------------------------------------------------------------------------------------------------------------------------------------------------|
|      |                                                                                                                                                                                                                                                                                                                                                                                                                                                           | Size, cm  | % Granulation Tissue:Fibrin | Cells (0–3) MC, IC, and EC |                                                                                                                                                                                                                 |
| 1    | 1-cm polyp arising from the posterior wall of the nasopharynx of heterogeneous mixed (high and intermediate) T2 and homogeneous intermediate T1 signal with marked contrast enhancement (Fig 1).                                                                                                                                                                                                                                                          | 1.0       | 10:90                       | MC (0)<br>IC (1)<br>EC (3) | No local tumor recurrence on endoscopy at 12 mo                                                                                                                                                                 |
| 2    | 2-cm polyp arising from the roof of the nasopharynx of heterogeneous mixed (high, intermediate, and low) T2 and homogeneous intermediate T1 signal with marked contrast enhancement; case reported previously <sup>22</sup>                                                                                                                                                                                                                               | 1.2       | 30:70                       | MC (0)<br>IC (2)<br>EC (1) | Polyp reoccurred and the size waxed and waned over 12 mo on MR imaging and over 55 months on endoscopy; no malignancy on repeated excision biopsies; died from distant metastases from nasopharyngeal carcinoma |
| 3    | 3-cm polyp involving the nasopharynx and sphenoid sinus (via a bony defect in the nasopharyngeal roof) of high T2 and intermediate T1 with marked contrast enhancement; more centrally there is a stellate area of lower T2 that shows less contrast enhancement (Fig 2)                                                                                                                                                                                  | 3.0       | 50:50 (Fig 7)               | MC (0)<br>IC (1)<br>EC (1) | No local tumor recurrence on endoscopy but died from metastatic disease from a bowel primary 6 mo later                                                                                                         |
| 4    | 5-cm polyp arising from the roof of the nasopharynx filling the nasopharyngeal cavity of high T2 and intermediate T1 with marked contrast enhancement; more centrally there is a stellate area of lower T2 that shows less contrast enhancement radiating to the periphery (Fig 3A, -B); case reported previously <sup>23</sup>                                                                                                                           | 5.0       | 90:10                       | MC (0)<br>IC (2)<br>EC (0) | No local tumor recurrence on endoscopy and imaging at 63 mo; no recurrence at 72 mo                                                                                                                             |
| 5    | 1-cm polyps in the nasopharynx and junction with the sphenoid sinus at the site of a large osteonecrotic defect in the nasopharyngeal roof, which were static on MR imaging for 32 months, before suddenly increasing to form a 5-cm polyp/mass filling the nasopharynx, nasal cavity, and sphenoid sinus, which is of heterogeneous mixed (high, intermediate, and low) T2, homogeneous intermediate T1 signal and mixed contrast enhancement (Fig 4A–D) | N/A       | N/A                         | N/A                        | 5-cm polyp completely excised in another institution and granulation tissue found with no evidence of malignancy                                                                                                |

**Note:**—No cells (0), some cells (1), many cells (2), abundant cells (3). MC indicates malignant cells; IC, inflammatory cells; EC, epithelial cells; N/A, histology report only, specimen not available for review.
